# Supplementary material for: Comparison of outcomes of peritoneal dialysis between patients after failed kidney transplant and transplant-naïve patients: a meta-analysis of observational studies
Source: PubMed Central journal article supplement (PMC8079072; doi:10.1080/0886022x.2021.1914659), 2021-04-26

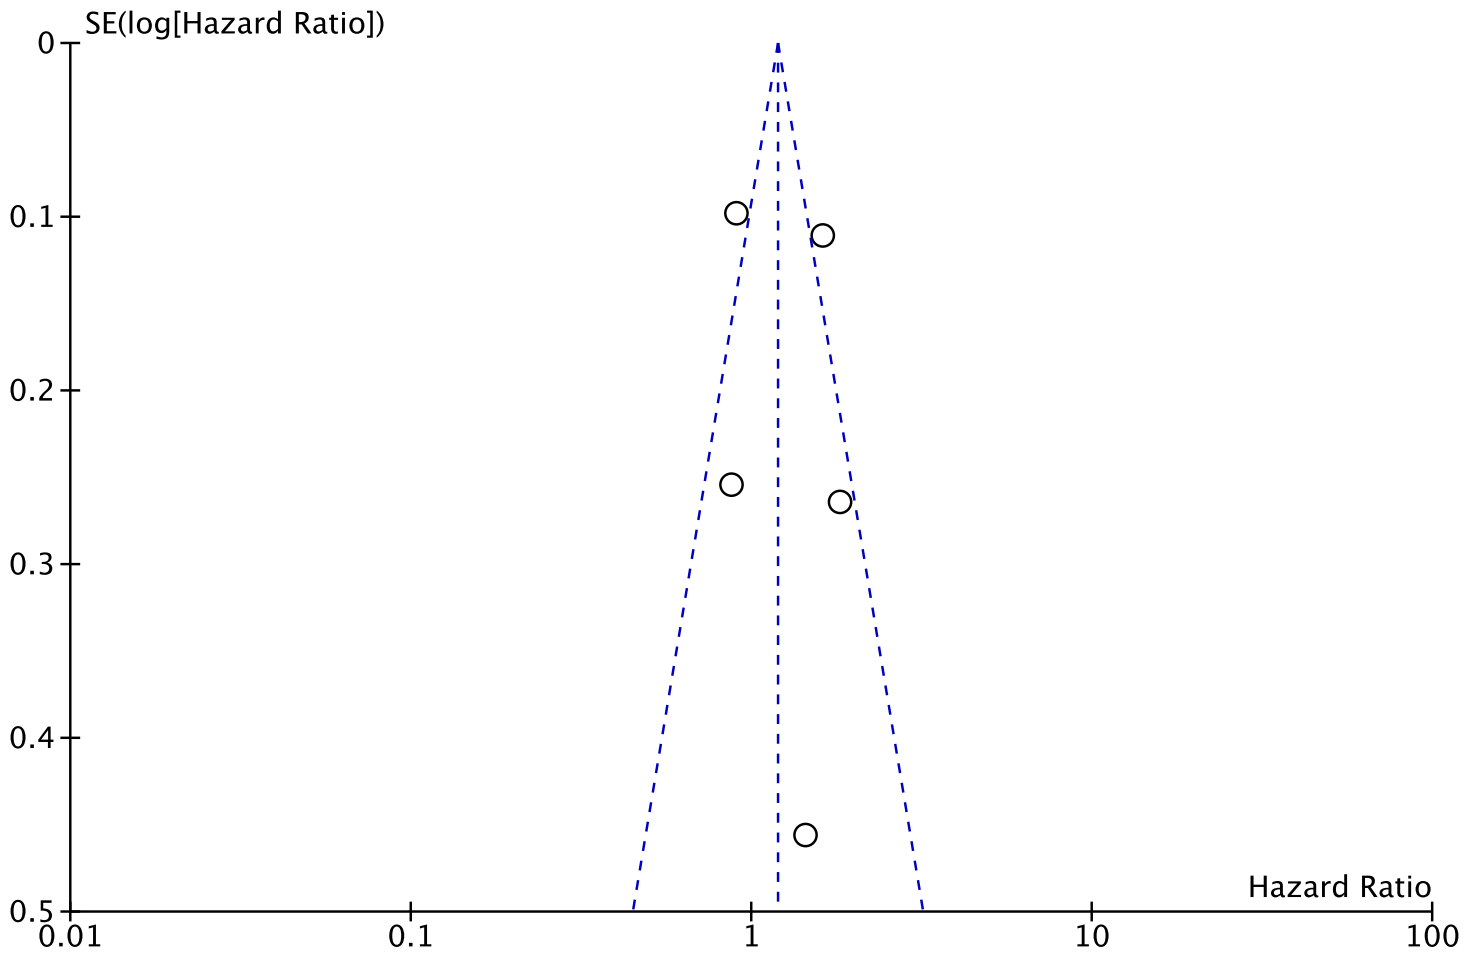

Supplement: IRNF_A_1914659_SM0634.pdf [file IRNF_A_1914659_SM0634.pdf]
