# Supplementary material for: Comparison of outcomes of peritoneal dialysis between patients after failed kidney transplant and transplant-naïve patients: a meta-analysis of observational studies
Source: PubMed Central journal article supplement (PMC8079072; doi:10.1080/0886022x.2021.1914659), 2021-04-26
Supplement: IRNF_A_1914659_SM0647.pdf [file IRNF_A_1914659_SM0647.pdf]

Table S1: Search strategy and results of PubMed database

| Search number | Query                                                                  | Search Details                                                                                                                                                                                                                                                                                                                                                                                                                                                                                                                                                                                                                                                                                                                                                                                                                                                                                                                                                                                 | Results |
|---------------|------------------------------------------------------------------------|------------------------------------------------------------------------------------------------------------------------------------------------------------------------------------------------------------------------------------------------------------------------------------------------------------------------------------------------------------------------------------------------------------------------------------------------------------------------------------------------------------------------------------------------------------------------------------------------------------------------------------------------------------------------------------------------------------------------------------------------------------------------------------------------------------------------------------------------------------------------------------------------------------------------------------------------------------------------------------------------|---------|
| 1             | ((kidney transplant) AND (failure)) AND (peritoneal dialysis)          | ("kidney transplantation"[MeSH Terms] OR ("kidney"[All Fields] AND "transplantation"[All Fields]) OR "kidney transplantation"[All Fields] OR ("kidney"[All Fields] AND "transplant"[All Fields]) OR "kidney transplant"[All Fields]) AND ("failure"[All Fields] OR "failures"[All Fields]) AND ("peritoneal dialysis"[MeSH Terms] OR ("peritoneal"[All Fields] AND "dialysis"[All Fields]) OR "peritoneal dialysis"[All Fields])                                                                                                                                                                                                                                                                                                                                                                                                                                                                                                                                                               | 3,386   |
| 2             | (failed kidney transplant) AND (peritoneal dialysis)                   | ("failed"[All Fields] OR "failing"[All Fields] OR "failings"[All Fields] OR "fails"[All Fields]) AND ("kidney transplantation"[MeSH Terms] OR ("kidney"[All Fields] AND "transplantation"[All Fields]) OR "kidney transplantation"[All Fields] OR ("kidney"[All Fields] AND "transplant"[All Fields]) OR "kidney transplant"[All Fields]) AND ("peritoneal dialysis"[MeSH Terms] OR ("peritoneal"[All Fields] AND "dialysis"[All Fields]) OR "peritoneal dialysis"[All Fields])                                                                                                                                                                                                                                                                                                                                                                                                                                                                                                                | 140     |
| 3             | (prior kidney transplant) AND (peritoneal dialysis)                    | ("prior"[All Fields] OR "priors"[All Fields]) AND ("kidney transplantation"[MeSH Terms] OR ("kidney"[All Fields] AND "transplantation"[All Fields]) OR "kidney transplantation"[All Fields] OR ("kidney"[All Fields] AND "transplant"[All Fields]) OR "kidney transplant"[All Fields]) AND ("peritoneal dialysis"[MeSH Terms] OR ("peritoneal"[All Fields] AND "dialysis"[All Fields]) OR "peritoneal dialysis"[All Fields])                                                                                                                                                                                                                                                                                                                                                                                                                                                                                                                                                                   | 252     |
| 4             | (failed kidney transplant) AND (renal replacement therapy)             | ("failed"[All Fields] OR "failing"[All Fields] OR "failings"[All Fields] OR "fails"[All Fields]) AND ("kidney transplantation"[MeSH Terms] OR ("kidney"[All Fields] AND "transplantation"[All Fields]) OR "kidney transplantation"[All Fields] OR ("kidney"[All Fields] AND "transplant"[All Fields]) OR "kidney transplant"[All Fields]) AND ("renal replacement therapy"[MeSH Terms] OR ("renal"[All Fields] AND "replacement"[All Fields]) AND "therapy"[All Fields]) OR "renal replacement therapy"[All Fields])                                                                                                                                                                                                                                                                                                                                                                                                                                                                           | 1,852   |
| 5             | ((transplant naive) AND (peritoneal dialysis)) AND (kidney transplant) | ("transplantability"[All Fields] OR "transplantable"[All Fields] OR "transplantated"[All Fields] OR "transplantating"[All Fields] OR "transplantation"[MeSH Terms] OR "transplantation"[All Fields] OR "transplantations"[All Fields] OR "transplanted"[All Fields] OR "transplanting"[All Fields] OR "transplantation"[MeSH Subheading] OR "transplantation s"[All Fields] OR "transplanter"[All Fields] OR "transplanters"[All Fields] OR "transplation"[All Fields] OR "transplants"[MeSH Terms] OR "transplants"[All Fields] OR "transplant"[All Fields]) AND ("naive"[All Fields] OR "naives"[All Fields]) AND ("peritoneal dialysis"[MeSH Terms] OR ("peritoneal"[All Fields] AND "dialysis"[All Fields]) OR "peritoneal dialysis"[All Fields]) AND ("kidney transplantation"[MeSH Terms] OR ("kidney"[All Fields] AND "transplantation"[All Fields]) OR "kidney transplantation"[All Fields] OR ("kidney"[All Fields] AND "transplant"[All Fields]) OR "kidney transplant"[All Fields]) | 12      |

|   |                                                    |                                                                                                                                                                                                                                                                                                                                                                                                                                                                                                                                                                                                                                                                                                                                                       |    |
|---|----------------------------------------------------|-------------------------------------------------------------------------------------------------------------------------------------------------------------------------------------------------------------------------------------------------------------------------------------------------------------------------------------------------------------------------------------------------------------------------------------------------------------------------------------------------------------------------------------------------------------------------------------------------------------------------------------------------------------------------------------------------------------------------------------------------------|----|
| 6 | (transplant naive) AND (peritoneal dialysis)       | ("transplantability"[All Fields] OR "transplantable"[All Fields] OR "transplantated"[All Fields] OR "transplantating"[All Fields] OR "transplantation"[MeSH Terms] OR "transplantation"[All Fields] OR "transplantations"[All Fields] OR "transplanted"[All Fields] OR "transplanting"[All Fields] OR "transplantation"[MeSH Subheading] OR "transplantation s"[All Fields] OR "transplanter"[All Fields] OR "transplanters"[All Fields] OR "transplation"[All Fields] OR "transplants"[MeSH Terms] OR "transplants"[All Fields] OR "transplant"[All Fields]) AND ("naive"[All Fields] OR "naives"[All Fields]) AND ("peritoneal dialysis"[MeSH Terms] OR ("peritoneal"[All Fields] AND "dialysis"[All Fields]) OR "peritoneal dialysis"[All Fields]) | 14 |
| 7 | (failed renal allograft) AND (peritoneal dialysis) | ("failed"[All Fields] OR "failing"[All Fields] OR "failings"[All Fields] OR "fails"[All Fields]) AND ("renal"[All Fields] OR "renals"[All Fields]) AND ("allograft s"[All Fields] OR "allografted"[All Fields] OR "allografts"[MeSH Terms] OR "allografts"[All Fields] OR "allograft"[All Fields] OR "transplantation, homologous"[MeSH Terms] OR ("transplantation"[All Fields] AND "homologous"[All Fields]) OR "homologous transplantation"[All Fields] OR "allografting"[All Fields]) AND ("peritoneal dialysis"[MeSH Terms] OR ("peritoneal"[All Fields] AND "dialysis"[All Fields]) OR "peritoneal dialysis"[All Fields])                                                                                                                       | 32 |
| 8 | (prior renal allograft) AND (peritoneal dialysis)  | ("prior"[All Fields] OR "priors"[All Fields]) AND ("renal"[All Fields] OR "renals"[All Fields]) AND ("allograft s"[All Fields] OR "allografted"[All Fields] OR "allografts"[MeSH Terms] OR "allografts"[All Fields] OR "allograft"[All Fields] OR "transplantation, homologous"[MeSH Terms] OR ("transplantation"[All Fields] AND "homologous"[All Fields]) OR "homologous transplantation"[All Fields] OR "allografting"[All Fields]) AND ("peritoneal dialysis"[MeSH Terms] OR ("peritoneal"[All Fields] AND "dialysis"[All Fields]) OR "peritoneal dialysis"[All Fields])                                                                                                                                                                          | 32 |
